# Supplementary material for: Efficacy of bumetanide in animal models of ischemic stroke: a systematic review and meta-analysis
Source: publisher site journal article supplement (doi:10.18632/aging.205910), 2024-06-07
Supplement: Supplementary file [file aging-v16i11-205910-supplementary-material-SD1.pdf]

**SUPPLEMENTARY FIGURE**

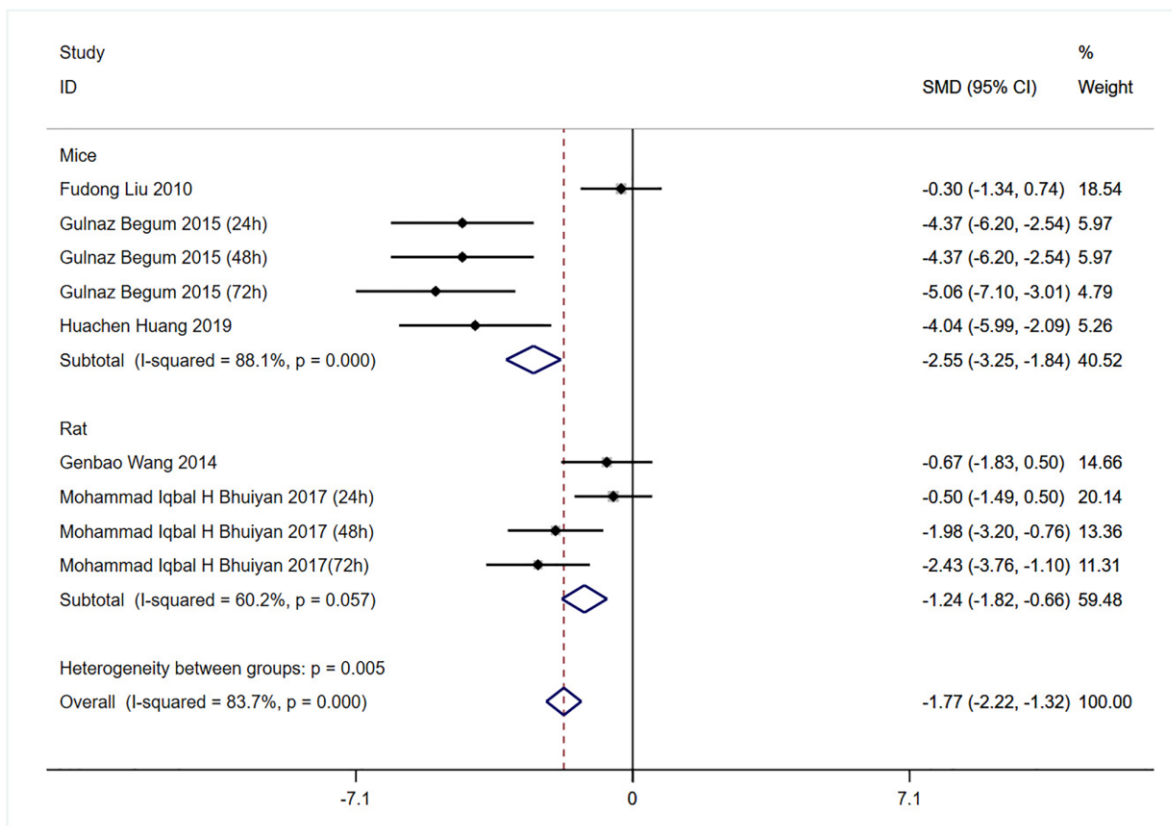

**Supplementary Figure 1. Forest plot shows the effects of different species on neurological score.**
